# Supplementary material for: Novel Dimer Derivatives of PF-543 as Potential Antitumor Agents for the Treatment of Non-Small Cell Lung Cancer
Source: MDPI journal article supplement (doi:10.3390/pharmaceutics14102035), 2022-09-24
Supplement: s1 [file s1]

Supplementary figure S1

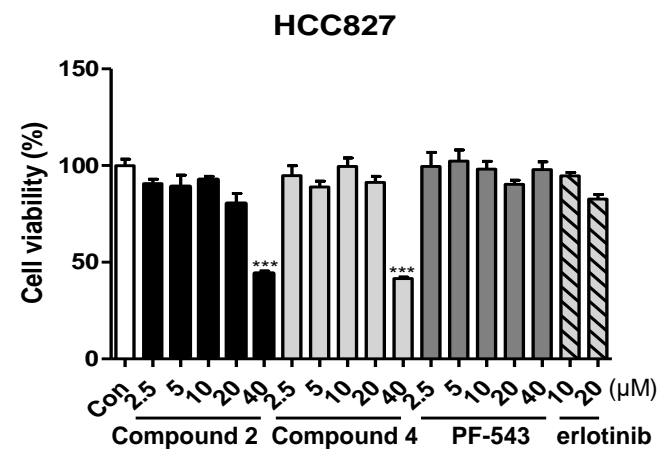

**Supplementary figure S1.** Cell cytotoxic effect of compound 2 and compound 4 in HCC827 cell line. HCC827 cells were seeded in 96 well plates and treated with 2.5-40 μM of compounds for 24h. Cell viability was assessed using MTT assay. The result is representative of three independent experiments and data are presented as mean ± SD. \*\*\*  $p < 0.005$  compared with non-treated control group.

Supplementary figure S2

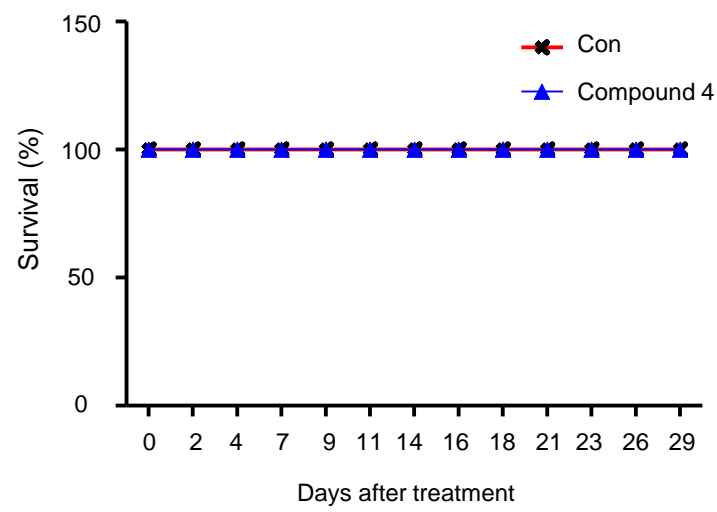

**Supplementary figure S2.** Overall survival with and without compound 4 treatment in A549 cell-induced tumor xenograft mice. The overall survival was observed for 29 days with intraperitoneal administration of vehicle (n=12) or compound 4 (5 mg/kg, n=12) 3 times a week.
